# Supplementary material for: Improved electrochemical performance of solid-state lithium metal batteries with stable SEI and CEI layers via in situ formation technique
Source: Royal Society of Chemistry journal article supplement (doi:10.1039/d3ta07835c), 2024-01-01
Supplement: d3ta07835c1.pdf [file d3ta07835c1.pdf]

## Supplementary information

### **Improved electrochemical performance of solid-state lithium metal batteries with stable SEI and CEI layers via in situ formation technique**

Tadesu Hailu Mengesha<sup>a,b,c</sup>, Shimelis Lemma Beshahwured<sup>a,b,d</sup>, Yola Bertilsya Hendria<sup>b</sup>, Kumlachew Zelalem Walle<sup>a,b</sup>, Yi-Shiuan Wu<sup>a</sup>, Chun-Chen Yang<sup>a,b,e\*</sup>

<sup>a</sup>Battery Research Center of Green Energy, Ming Chi University of Technology, New Taipei City 24301, Taiwan R.O.C.

<sup>b</sup>Department of Chemical Engineering, Ming Chi University of Technology, New Taipei City 24301, Taiwan, R.O.C.

<sup>c</sup>College of Natural and Computational Science, Department of Chemistry, Wolkite University, Wolkite, 07 SNNPR, Ethiopia.

<sup>d</sup>Department of Material Science and Engineering, Adama Science and Technology University, Adama, Ethiopia.

<sup>e</sup>Department of Chemical and Materials Engineering, and Green Technology Research Center, Chang Gung University, Taoyuan City 333, Taiwan, ROC

\*Corresponding authors Tel.: +886 2 29089899 ext.4962/4952; fax: +886 2 29085941.  
E-mail: ccyang@mail.mcut.edu.tw (C.-C. Yang)

## 1. Sandwich-type composite SSEs membrane synthesis

We synthesized sandwich-type solid polymer electrolyte membranes (SHSE1) with different constituents using solution casting. The first suspension comprised PVDF-HFP, LiTFSI, and SN (10 wt. % *versus* polymer) and 10 wt. % PDA@LALZO networked filler applied to build up the layer facing both the anode and cathode. The second suspension contained the same constituents as the first suspension, except 30 wt. % PDA@LALZO networked filler, which was used to construct the middle layer of the composite membrane. The weight ratio of PVDF-HFP to LiTFSI in each suspension was 2:1. DMF was used as a solvent to prepare the suspensions. We used a facile solution casting method to synthesize the SHSE membrane with a wet thickness of 150  $\mu\text{m}$  (each side layer) and 500  $\mu\text{m}$  (middle layer). The SHSE1 membrane was then dried in a vacuum oven at 60  $^{\circ}\text{C}$  for 24 h and peeled off the glass substrate. Further, the membrane was exposed to a cold-pressing hydraulic machine (1000 psi for 3 min) to reduce the thickness and enhance the packing density of the membrane and again dried in a vacuum oven at 80  $^{\circ}\text{C}$  for 12 h. Scheme 2 illustrates the synthesis of SHSE membrane using solution-casting method. For the control membrane (i.e., SHSE0), we used the same protocols but no PDA@LALZO filler from the anode side. The total thickness of the electrolyte membranes is controlled to *ca.* 160  $\mu\text{m}$ .

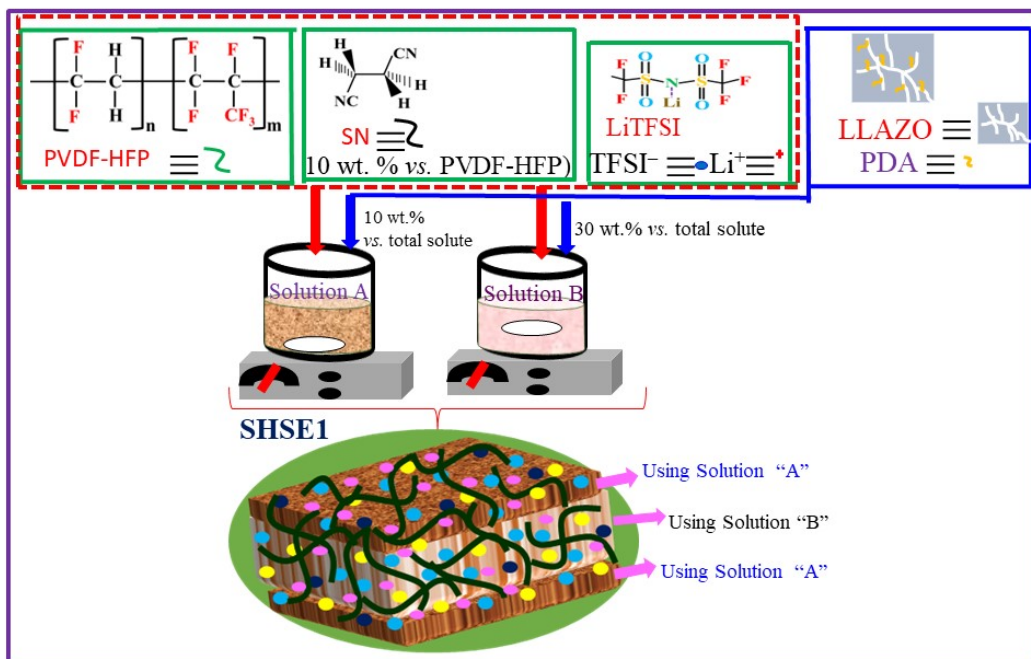

**Scheme S1.** A schematic representation of the synthesis procedure of SHSE1 composite membrane using a solution-casting method.

## 2. Surface modification of VGCF

In this study, we applied polydopamine (PDA) to modify the surface of VGCF to improve their wettability in matrices. First, we dissolved 2.3 wt. % of dopamine HCl in deionized (DI) water and then 1.4 wt. % of Tris-base to initiate self-polymerization. The VGCF was dispersed in DI water and ultrasonicated for 1 h in a separate beaker, followed by treatment with a PDA solution under continuous stirring overnight. Then, we collected the PDA-modified VGCF through centrifugation (6000 rpm with 10 min) and dried at 80 °C for 24 h. Hereafter, we refer to PDA-modified VGCF fillers as PDA@VGCF.

### 3. Synthesis of $\text{LiNi}_{0.8}\text{Co}_{0.1}\text{Mn}_{0.1}$ cathode material

$\text{Ni}_{0.8}\text{Co}_{0.1}\text{Mn}_{0.1}(\text{OH})_2$  hydroxide precursor was fabricated *via* a facile co-precipitation approach, followed by a solid-state reaction with suitable annealing conditions. Typically, the required amount of nickel sulfate hexahydrate ( $\text{NiSO}_4 \cdot 6\text{H}_2\text{O}$ ), cobalt sulfate heptahydrate ( $\text{CoSO}_4 \cdot 7\text{H}_2\text{O}$ ), and manganese sulfate monohydrate ( $\text{MnSO}_4 \cdot \text{H}_2\text{O}$ ) were dissolved at 80:10:10 molar ratio. The required molar ratio of sodium hydroxide (4 M NaOH) and ammonium hydroxide (8 M  $\text{NH}_4\text{OH}$ ) was separately dissolved in an aqueous medium container. Furthermore, the aqueous solution of transition metal sulfate, NaOH, and  $\text{NH}_4\text{OH}$  was injected into the Taylor-Couette Reactor (TCR). The reaction temperature of 60 °C and pH level of 11 was maintained throughout the reaction. After 10 h, the reactor attains a steady state. Then the reaction was completed, and the collected hydroxide precipitated product was washed with DI water and ethanol followed by dried off at 80 °C for 24 h. Finally, the obtained precursor powders and  $\text{LiOH} \cdot \text{H}_2\text{O}$  at a molar ratio of 1:1.05 were conducted in a solid-state reaction by using the dry ball mill method and then calcination at 830 °C for 12 h to form Bare- $\text{LiNi}_{0.8}\text{Co}_{0.1}\text{Mn}_{0.1}\text{O}_2$ .

### 4. Preparation of lithiated-Nafion solution

Following the method developed by <sup>1,2</sup>, we prepared Lithium Nafion (Li-Nf) by adding 25.2 mg of  $\text{LiOH} \cdot \text{H}_2\text{O}$  into the commercial Nafion (5 wt. % in  $\text{H}_2\text{O}$  and 1-propanol, 10 mL) solution. The solution was then stirred at 60 °C for 2 h and dried in a vacuum oven at 80 °C for 12 h to afford lithiated Nafion (Li-Nf) residue. Then, 0.1 g of dried Li-Nf solid residue was dissolved and diluted in N-methyl pyrrolidone (NMP,

9.9 g), and the solution was stirred for 6 h to obtain a 1 wt.% Li-Nf solution (i.e., 1 wt. % in NMP).

## 5. Surface modification of NCM811 active materials by Li-Nf coating

Firstly, we dissolved 1 wt. % of as-prepared Li-Nf solid residue in NMP (N-Methyl-2-pyrrolidone, Sigma- Aldrich) and stirred until completely dissolved (*ca.* 3 h). Then we poured it slowly into another beaker containing pre-dispersed (*ca.* 1 h) NCM811 cathode material suspension and continuously stirred for 12 h. Lastly, the as-coated NCM811 powder was filtered and dried in a vacuum oven for 12 h at a temperature of 60 °C (hereafter, we denoted as Li-Nf@NCM811). Lithium Nafion, which is a lithiated sulfonated tetrafluoroethylene-based fluoropolymercopolymer—has good ionic conductivity, high chemical stability, and serves as a protective layer on the cathode material. With these properties, Li-Nf can help to minimize the microcracks by covering the NCM811 particles and inhibit the surface reactions<sup>3</sup>. Fig. S4(a) presents the SEM images of Li-Nf@NCM811 powder. Further confirmation of Li-Nf layer production on NCM811 particles was achieved by performing XPS-based characterization of the NCM811 particles, as shown in Figs. S4(c) and (d). In detail, no peaks of F 1s can be observed in pristine NCM811, suggesting the absence of Li-Nf layer, as shown in Fig. S4(c). However, the F 1s spectra of Li-Nf@NCM811 is deconvoluted into two peaks at ~690.2 and 687.4 eV, which can be assigned to the C–F and Li–F bonds, respectively, as shown in Fig. S4(d). Similarly, the S 2p peak is observed on the Li-Nf coated NCM811 at 163.4 eV, while the corresponding peak is absent in the pristine sample, as shown in Fig. S4(c).

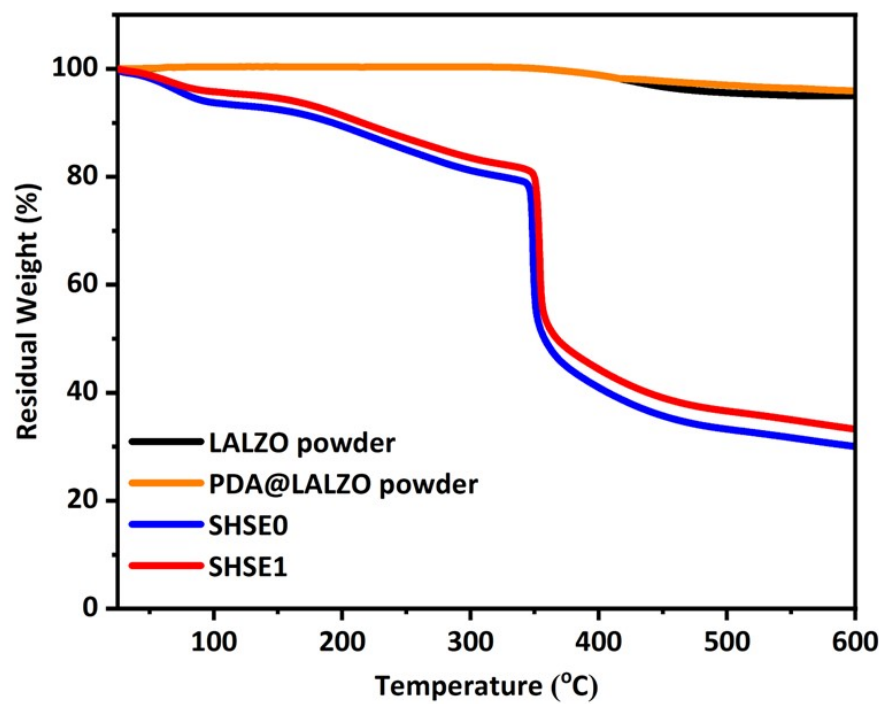

**Fig. S1** TGA behavior of LALZO and PDA@LALZO fillers, SHSE0, and SHSE1 membranes

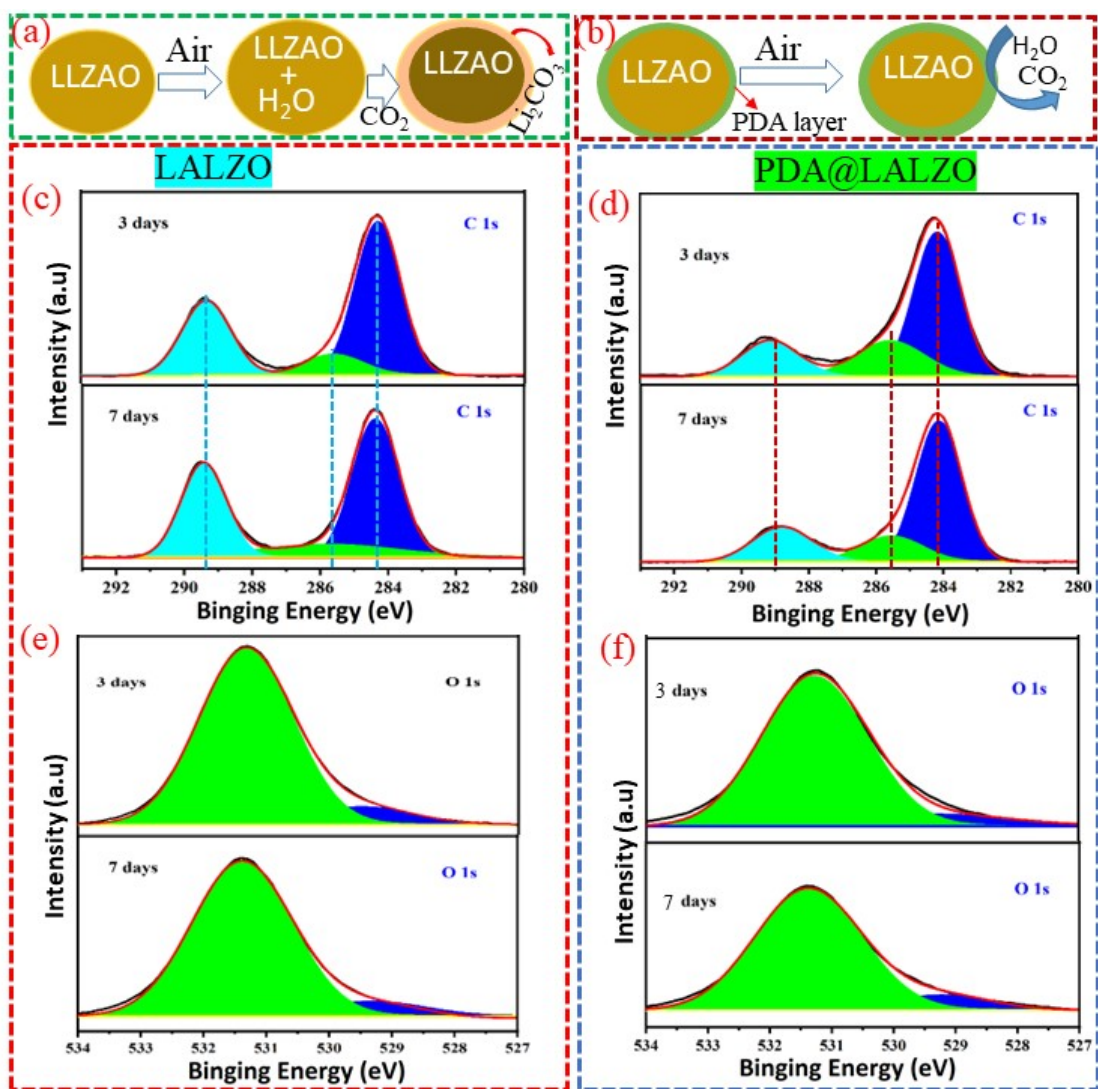

**Fig. S2** Schematic presentation of (a). the possible interaction of LALZO with moisture; (b). application of PDA coating layer on minimizing the interaction of LALZO filler and moisture; (c)-(f). XPS spectra of aged LALZO and PDA@LALZO interconnected fillers.

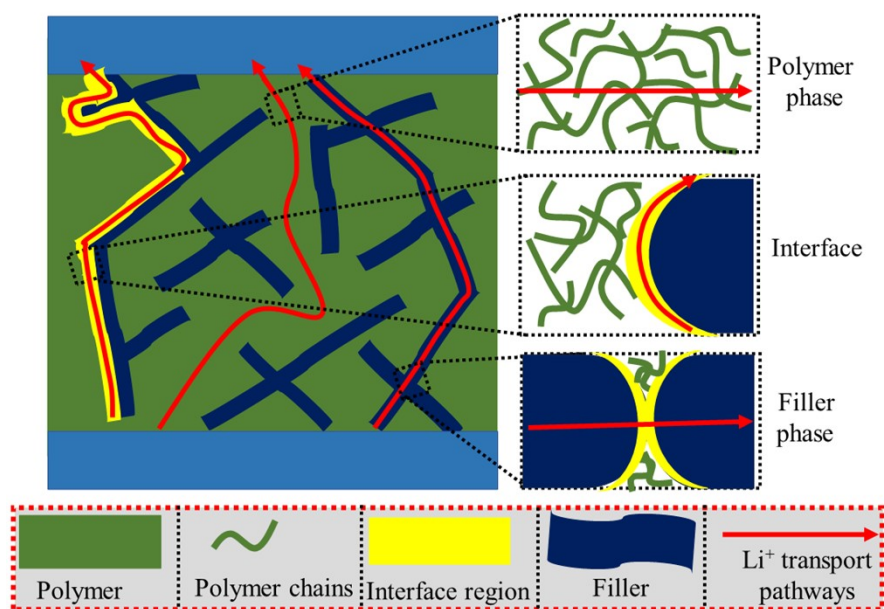

**Scheme. S2** possible  $\text{Li}^+$  migration pathways in the as-prepared composite solid electrolyte membranes.

**Table S1** Quantification result (%) of  $^6\text{Li}$  ss-NMR resonance spectra in different components of the as-prepared composite membranes before and after galvanostatic cycling.

| Composite membranes | Before Cycling |           |        | After Cycling |           |                    |        |
|---------------------|----------------|-----------|--------|---------------|-----------|--------------------|--------|
|                     | LiTFSI         | Interface | Filler | LiTFSI        | Interface | Filler + interface | Filler |
| SHSE0               | 57.81          | 42.19     | —      | 51.24         | 9.17      | 39.59              | —      |
| SHSE1               | 52.71          | 32.74     | 14.55  | 32.95         | 34.45     | —                  | 32.60  |



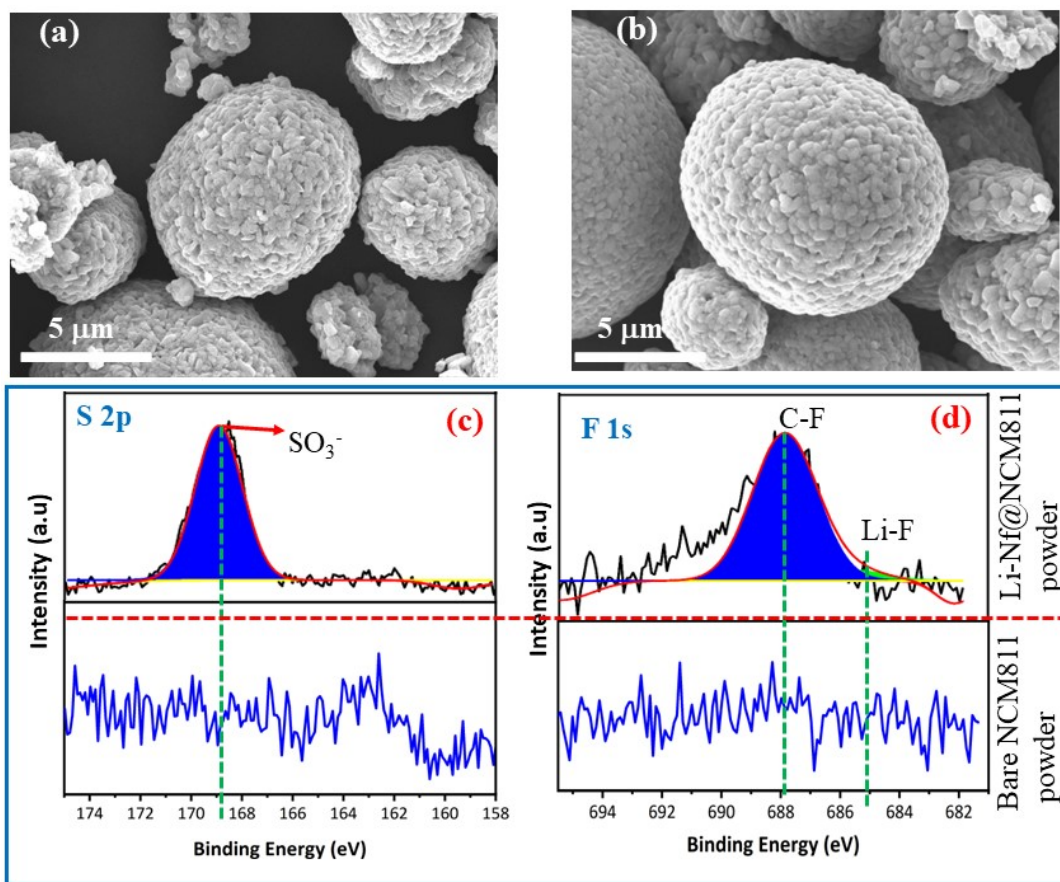

**Fig. S3** SEM image of (a). bare NCM811, and (b). Li-Nf@NCM811; XPS spectra of bare and Li-Nf modified NCM 811 powders, (c). S 2p and (d) F 1s.

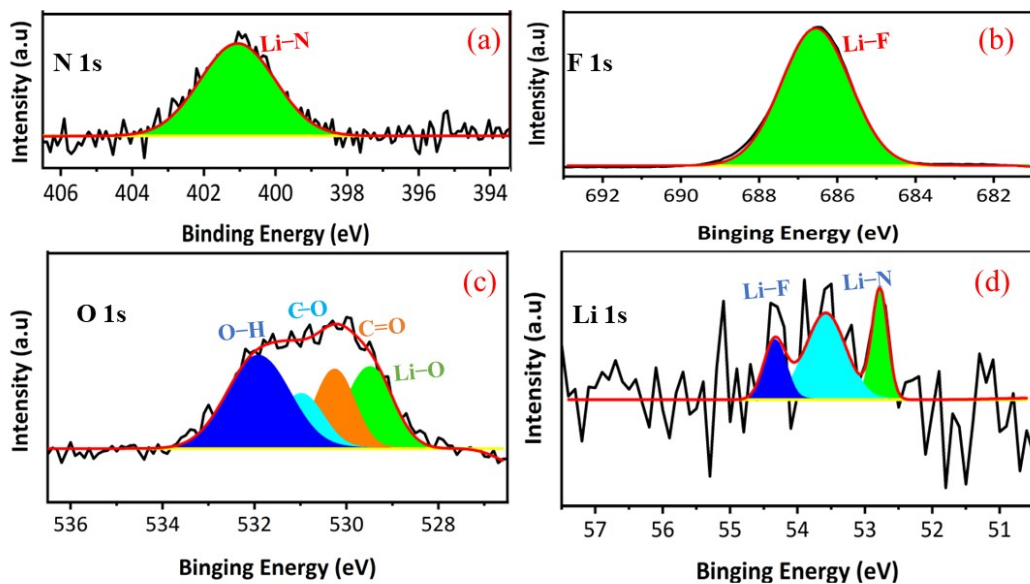

**Fig. S4** XPS profile of (a). N 1s, (b). F 1s, (c). O 1s, and (d). Li 1s in modified lithium-metal surface.

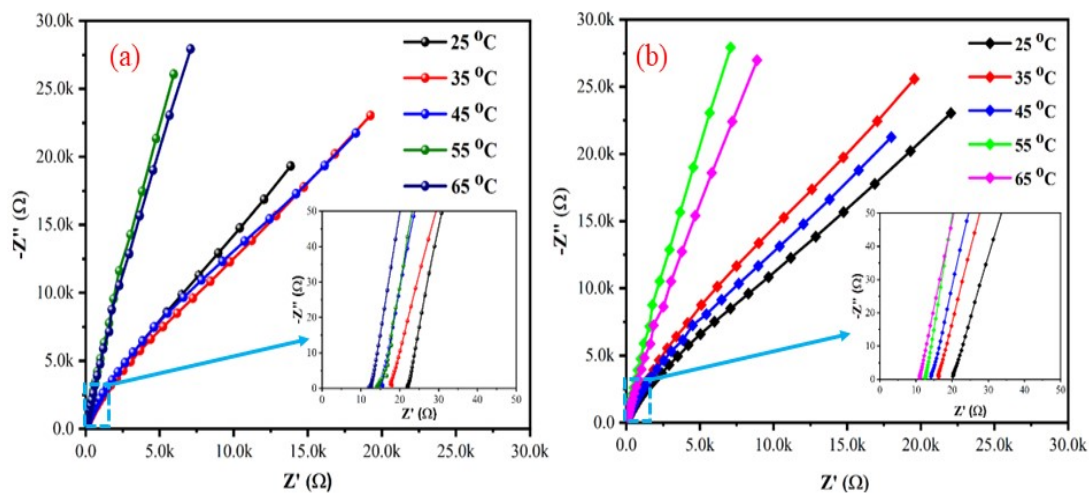

**Fig. S5** EIS profiles of (a). SHSE0; (b). SHSE1 composite membrane measured at 25-65 °C.

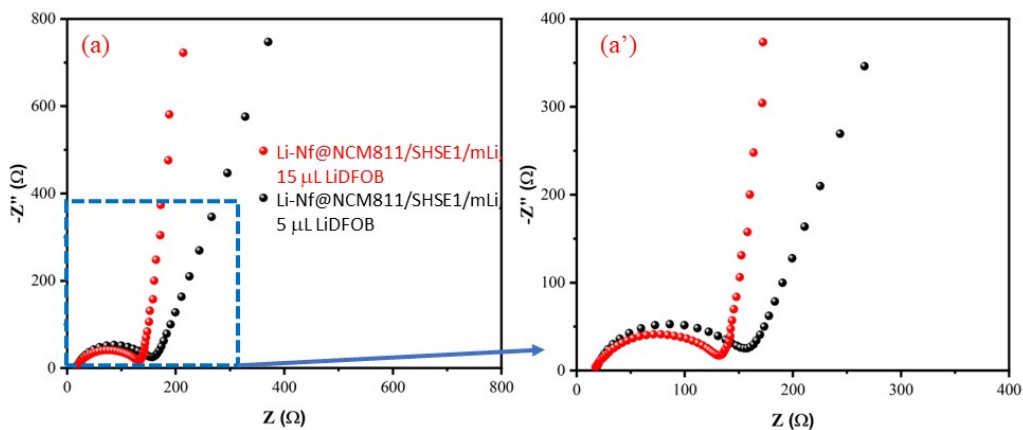

**Fig. S6** EIS profile of Li-Nf@NCM811/SHSE1/mLi using 5 and 15  $\mu\text{L}$  of LiDFOB-based liquid electrolyte.

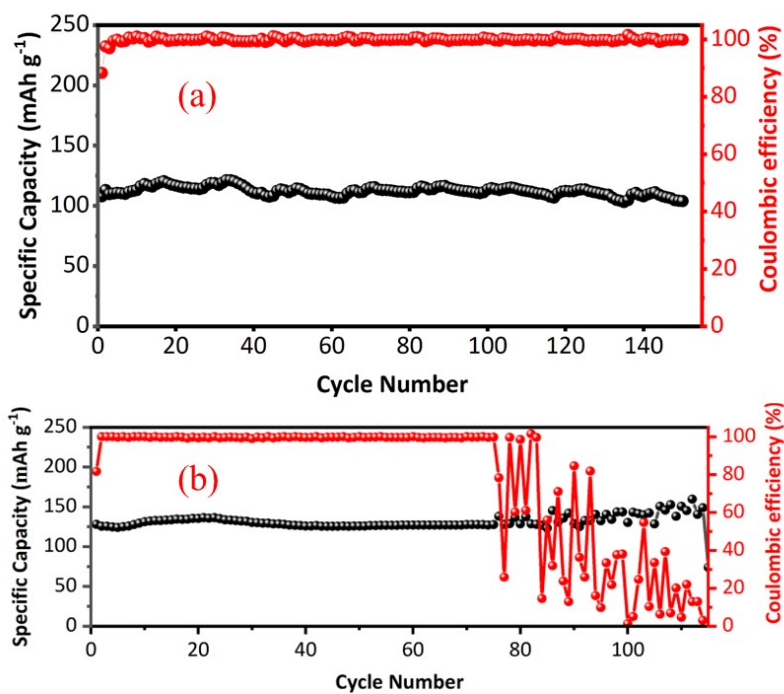

**Fig. S7** The long-term cycling performance of Li-Nf@NCM811/SHSE1/mLi with 5 and 15  $\mu\text{L}$  of LiDFOB-based LE between 2.8-4.3 V at 1C/1C and at RT.

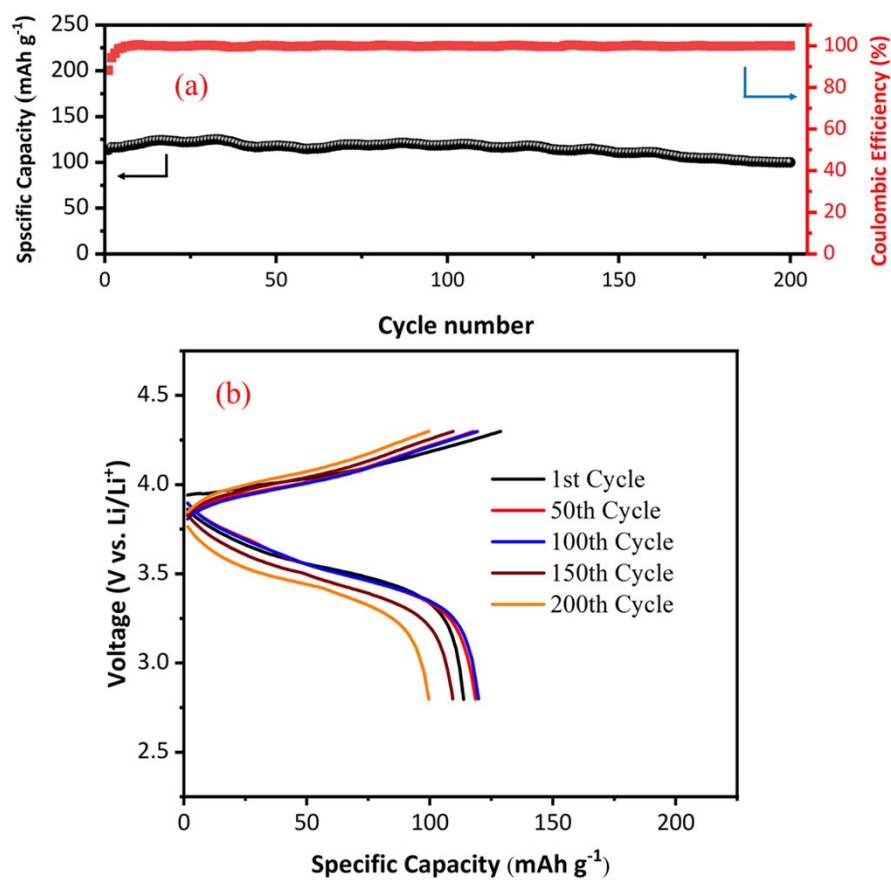

**Fig. S8(a).** The long-term cycling and (b). charge-discharge performance of Li-Nf@NCM811/SHSE1/mLi cell without LiDFOB-based LE added between 2.8-4.3 V at 1C and RT.

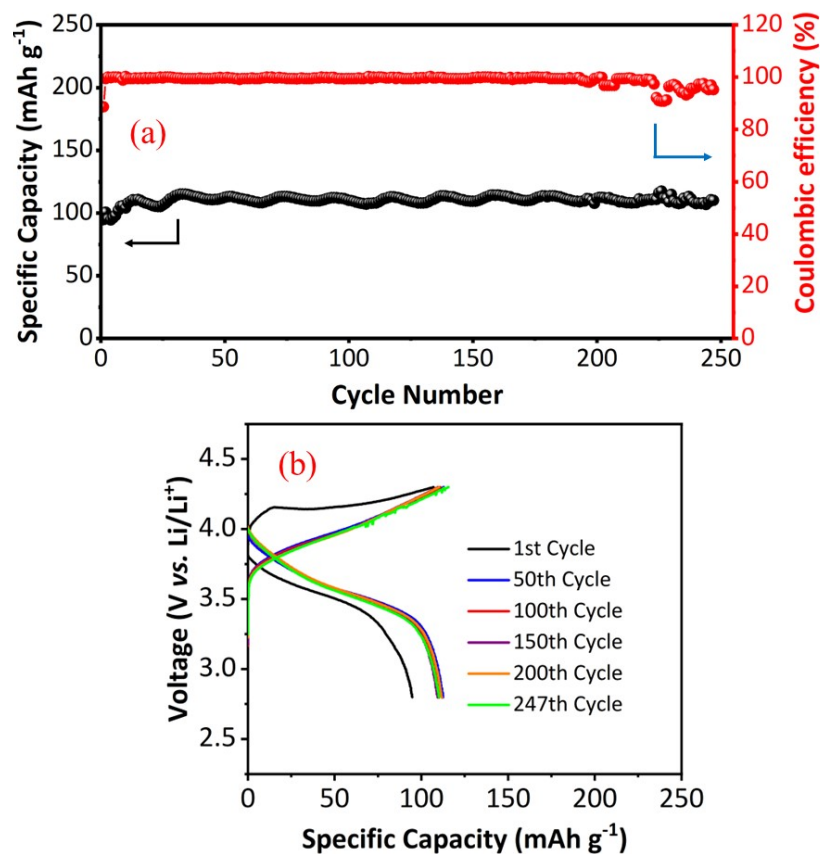

**Fig. S9** (a). The long-term cycling and (b). charge-discharge performance of Li-Nf@NCM811/SHSE1/bLi with LiDFOB-based LE added between 2.8-4.3 V at 1C and RT.

**Table S2** Summary of different resistance values of SHSE0 and SHSE1 membranes sandwiched between Li-Nf@NCM811-based cathode and mLi-metal anodes.

| Cell configuration<br>(Li-Nf@NCM811//mLi) | Before cycle impedance<br>values ( $\Omega$ ) |             |             |             | After cycle impedance values<br>( $\Omega$ ) |             |             |            |             |
|-------------------------------------------|-----------------------------------------------|-------------|-------------|-------------|----------------------------------------------|-------------|-------------|------------|-------------|
|                                           | $R_b$                                         | $R_{(a,i)}$ | $R_{(c,i)}$ | $R_{total}$ | $R_b$                                        | $R_{(a,i)}$ | $R_{(c,i)}$ | $R_{(ct)}$ | $R_{total}$ |
| SHSE1                                     | 11.97                                         | 7.22        | 91.24       | 110.43      | 38.28                                        | 2.63        | 101.68      | 156.90     | 299.49      |

|       |       |       |       |        |       |      |        |        |        |
|-------|-------|-------|-------|--------|-------|------|--------|--------|--------|
| SHSE0 | 12.17 | 23.27 | 92.37 | 127.81 | 46.84 | 2.17 | 114.80 | 193.50 | 357.31 |
|-------|-------|-------|-------|--------|-------|------|--------|--------|--------|

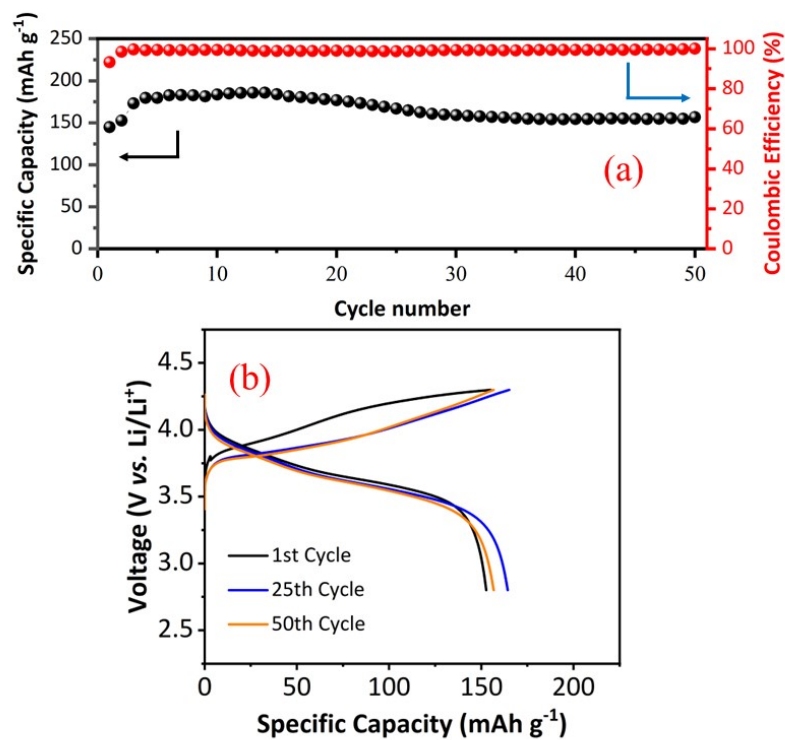

**Fig. S10(a).** Cycling profile, (b). the charge-discharge curve of  $3 \times 5 \text{ cm}^2$  pouch-type

Li-Nf@NCM811/SHSE1/mLi cell at 0.1C between 2.8-4.3 V at RT.

**Table S3** Comparative study of the characteristic performances of the current solid-state-based cells with related works performed elsewhere.

| Data<br>Cells                                                | Ionic<br>conductivity<br>(S cm <sup>-1</sup> , °C) | CCD<br>(mA cm <sup>-2</sup> ) | Capacity<br>(mAh g <sup>-1</sup> )<br>(cycles, °C) | Capacity<br>retention<br>(%) | Potential<br>range (V),<br>(C-rate) | Refs.                |
|--------------------------------------------------------------|----------------------------------------------------|-------------------------------|----------------------------------------------------|------------------------------|-------------------------------------|----------------------|
| LFP/LLZTO-HMP/Li                                             | 7.3×10 <sup>-4</sup> ,<br>RT                       | 1.91                          | 138.6 (500,<br>25)                                 | 89.50                        | 2.5–4.0<br>(0.2)                    | <sup>3</sup>         |
| NCM622 B, F-CSE Li                                           | 2.16×10 <sup>-4</sup> ,<br>25                      | NA                            | 143.8 (300,<br>RT)                                 | 94.40                        | 4.3–4.4 (1)                         | <sup>4</sup>         |
| NCM622-8NCTs/SPE/Li                                          | 7.9 × 10 <sup>-5</sup> ,<br>25                     | NA                            | 90(100, 25)                                        | 69.23                        | 2.7-4.2(1)                          | <sup>5</sup>         |
| LFP/ PHTL-FEC-LLZTO/Li                                       | 6.52×10 <sup>-5</sup> ,<br>50                      | NA                            | 117.60 (200,<br>50)                                | 88.5                         | 2.8–4.1<br>(0.5)                    | <sup>6</sup>         |
| NCM523  PEO-LLZTO@Aro  Li                                    | 4.57×10 <sup>-4</sup> ,<br>20                      | 1.4                           | NM (50, 50)                                        | NA                           | 2.8–4.3<br>(0.1)                    | <sup>7</sup>         |
| Li-Nf@NCM811/<br>SHSE1/Li, coin<br>cell                      | <b>5.47×10<sup>-4</sup>,<br/>RT</b>                | <b>2.5</b>                    | <b>108.85 (450,<br/>RT)</b>                        | <b>80.16</b>                 | <b>2.8–4.3 (1)</b>                  | <b>This<br/>work</b> |
|                                                              |                                                    |                               | <b>109.20 (400,<br/>RT)</b>                        | <b>78.01</b>                 | <b>2.8–4.3 (2)</b>                  |                      |
| Li-Nf@NCM811/<br>SHSE1/Li, 5×3<br>cm <sup>2</sup> pouch cell |                                                    |                               | <b>158.66 (50,<br/>RT)</b>                         | <b>83.00</b>                 | <b>2.8–4.3<br/>(0.1)</b>            |                      |

FEC = fluoroethylene carbonate; a boron, fluorine-donating liquid electrolyte (B, F-LE); HMP = high-speed mechanical polishing, NA = not available



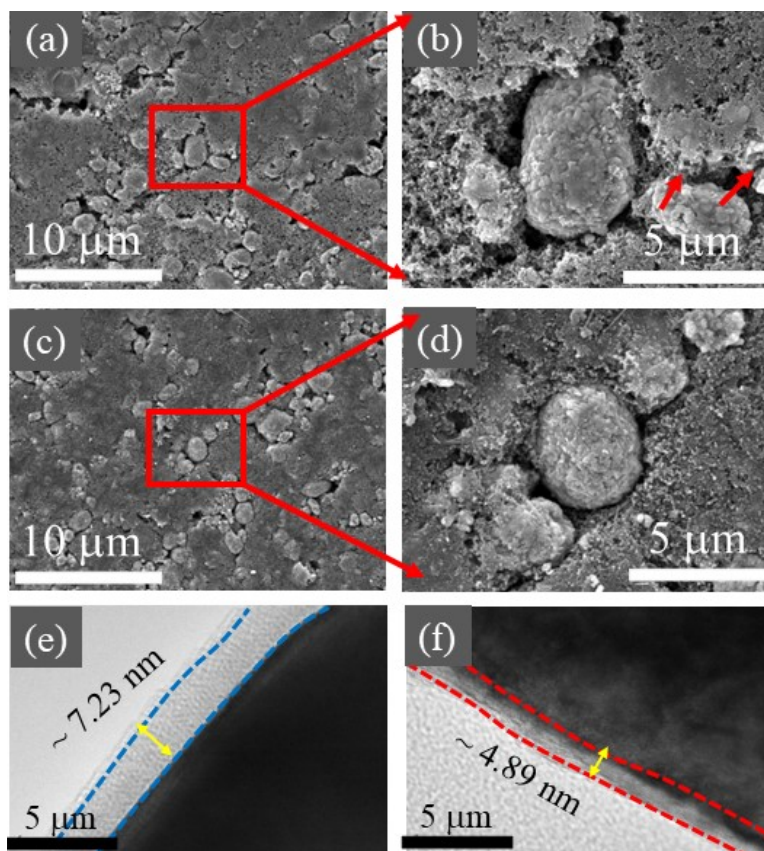

**Fig. S11** SEM images of Li-Nf@NCM811 surface disassembled from coin-type cells cycled (a) and (b) without, and (c) and (d) with the addition of 10  $\mu$ L LiDFOB LE; HR-TEM images of Li-Nf@NCM811 electrode cycled (e) and without (f) with the addition of LiDFOB-based LE.



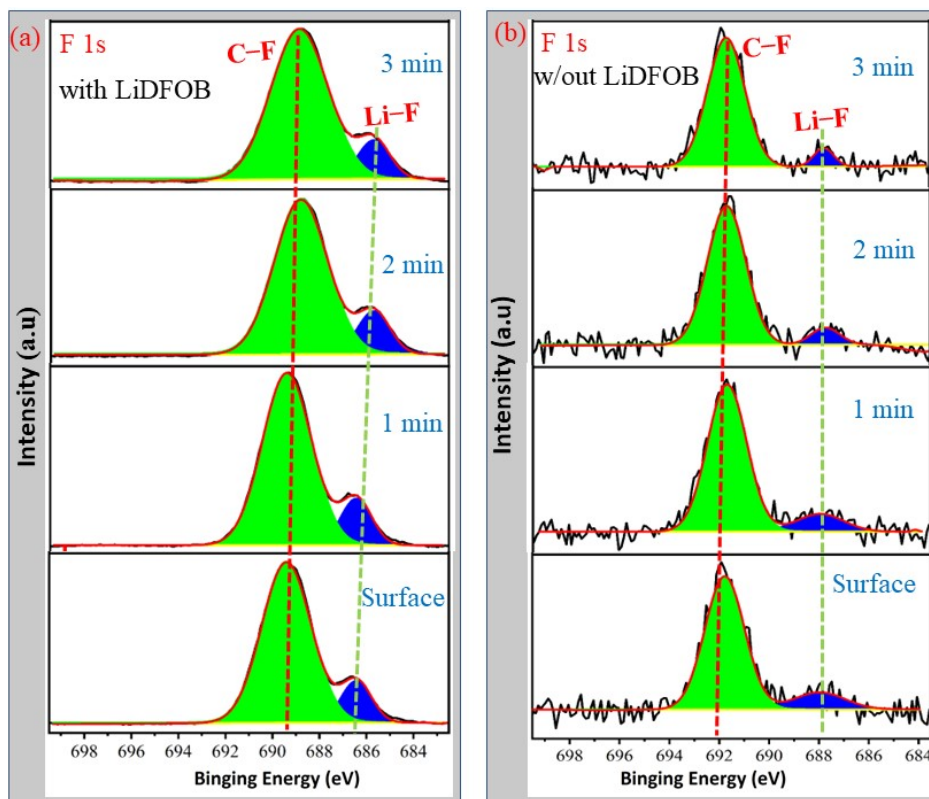

**Fig. S12** XPS spectra of F 1s in cycled mLi-metal anodes: (a). with, and (b). without LiDFOB-based LE.

## References

- 1 S. Jiang, Y. Lu, Y. Lu, M. Han, H. Li, Z. Tao, Z. Niu and J. Chen, *Chem. - Asian J.*, 2018, **13**, 1379–1385.
- 2 K. Z. Walle, Y. S. Wu, S. H. Wu, J. K. Chang, R. Jose and C. C. Yang, *ACS Appl. Mater. Interfaces*, 2022, **14**, 15259–15274.
- 3 Z. Bi, N. Zhao, L. Ma, Z. Fu, F. Xu and C. Wang, *Chem. Eng. J.*, 2020, **387**, 124089.

- 4 X. Li, L. Cong, S. Ma, S. Shi, Y. Li, S. Li, S. Chen, C. Zheng, L. Sun, Y. Liu and H. Xie, *Adv. Funct. Mater.*, 2021, **31**, 1–10.
- 5 A. Orue, J. M. López del Amo, F. Aguesse, M. Casas-Cabanas and P. López-Aranguren, *Energy Storage Mater.*, 2023, **54**, 524–532.
- 6 Q. Wang, Y. Su, W. Zhu, Z. Li, D. Zhang, H. Wang, H. Sun, B. Wang, D. Zhou and L. Z. Fan, *Electrochim. Acta*, 2023, **446**, 142063.
- 7 J. Li, H. Zhang, Y. Cui, H. Da, Y. Cai and S. Zhang, *Chem. Eng. J.*, 2022, **450**, 138457.
